# Supplementary figures and images for: Successful Treatment of Wounds from Nonuremic Calciphylaxis with Acellular Piscine Dermis
Source: PubMed Central journal article supplement — Plast Reconstr Surg Glob Open. 2023 Jul 12;11(7):e5120. doi: 10.1097/GOX.0000000000005120 (PMC10337706; doi:10.1097/gox.0000000000005120), 2023-07-12

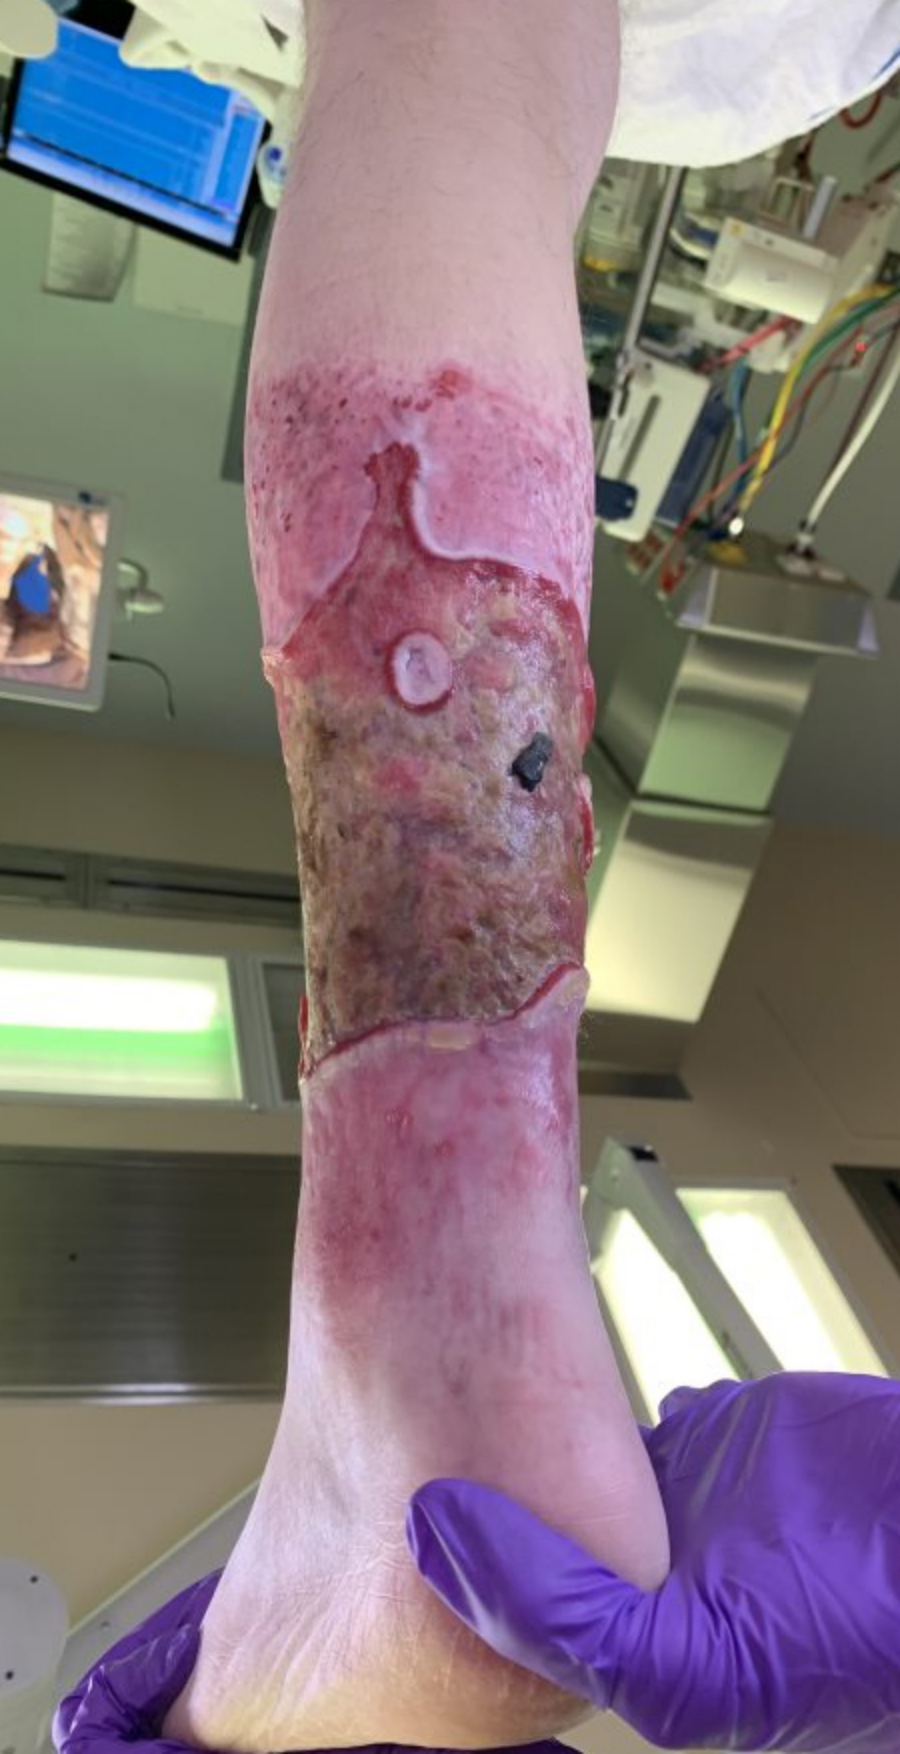

Supplement: gox-11-e5120-s001.pdf [file gox-11-e5120-s001.pdf]

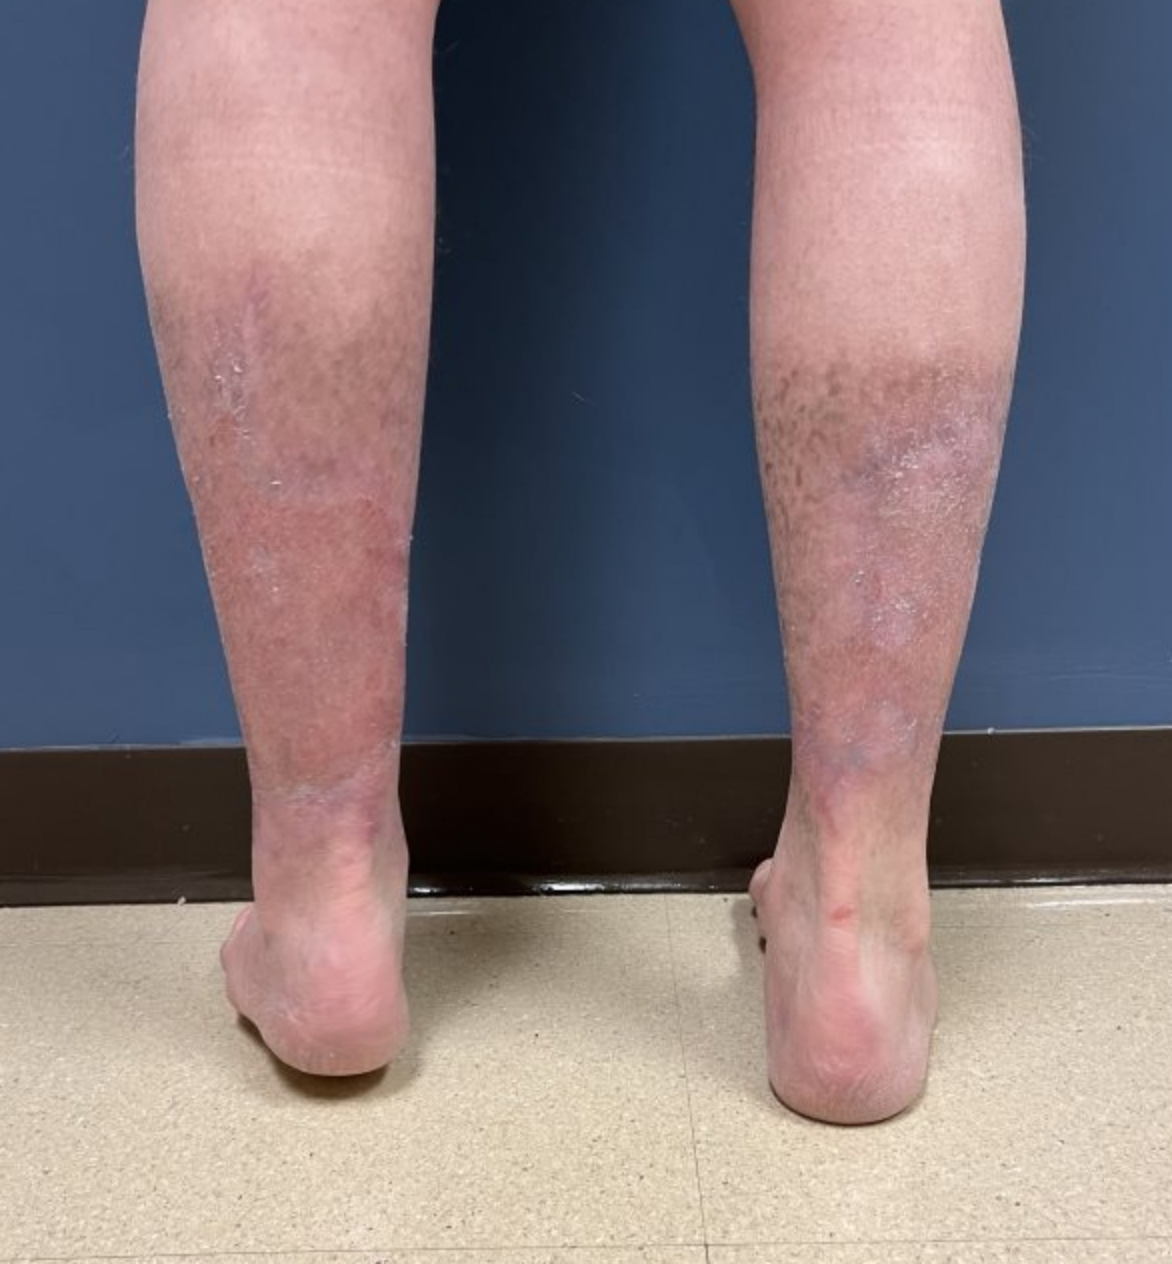

Supplement: gox-11-e5120-s002.pdf [file gox-11-e5120-s002.pdf]
